# Supplementary material for: Comparative hydrodynamic and nanoscale imaging study on the interactions of teicoplanin-A2 and bovine submaxillary mucin as a model ocular mucin
Source: Sci Rep. 2023 Jul 13;13:11367. doi: 10.1038/s41598-023-38036-6 (PMC10344913; doi:10.1038/s41598-023-38036-6)
Supplement: Supplementary file 1 — Supplementary Information 1. [file 41598_2023_38036_MOESM1_ESM.xlsx]

## Sheet: Figure 2 SV-AUC
Figure 2a							Figure 2b							Figure 2c
BSM control 1 mg/mL		teicoplanin control 0.125 mg/mL		BSM + teicoplanin 0.125 mg/mL			BSM control 1 mg/mL		teicoplanin control 1.25 mg/mL		BSM 1 mg/mL + teicoplanin 1.25 mg/Ml			BSM control 1 mg/mL		teicoplanin control 12.5 mg/mL		BSM 1 mg/mL + teicoplanin 12.5 mg/mL
0	0	0	0	0	0		0	0	0	0.5422	0	0		0	0	0	0	0	0
0.50505	0.03746	0.20202	0.00603	0.50505	1.62293e-05		0.50505	0.03746	0.20202	0.27076	0.50505	0.01844		0.50505	0.03746	0.20202	0	0.50505	0
1.0101	0.08412	0.40404	0.0201	1.0101	0.00936		1.0101	0.08412	0.40404	0.27041	1.0101	0.07073		1.0101	0.08412	0.40404	1.64276	1.0101	0
1.51515	0.12543	0.60606	0.02782	1.51515	0.02597		1.51515	0.12543	0.60606	0.26593	1.51515	0.0807		1.51515	0.12543	0.60606	5.99729	1.51515	0.01493
2.0202	0.17636	0.80808	0.02681	2.0202	0.0488		2.0202	0.17636	0.80808	0.25111	2.0202	0.06497		2.0202	0.17636	0.80808	15.4058	2.0202	0.07397
2.52525	0.23088	1.0101	0.02137	2.52525	0.07584		2.52525	0.23088	1.0101	0.22461	2.52525	0.08332		2.52525	0.23088	1.0101	9.6119	2.52525	0.16459
3.0303	0.27755	1.21212	0.01604	3.0303	0.10073		3.0303	0.27755	1.21212	0.1936	3.0303	0.12707		3.0303	0.27755	1.21212	2.2551	3.0303	0.44983
3.53535	0.31536	1.41414	0.01234	3.53535	0.12201		3.53535	0.31536	1.41414	0.16721	3.53535	0.17201		3.53535	0.31536	1.41414	0.52097	3.53535	1.19795
4.0404	0.34332	1.61616	0.00904	4.0404	0.14139		4.0404	0.34332	1.61616	0.15179	4.0404	0.20583		4.0404	0.34332	1.61616	0.85452	4.0404	2.46241
4.54545	0.35333	1.81818	0.00604	4.54545	0.15808		4.54545	0.35333	1.81818	0.15002	4.54545	0.22492		4.54545	0.35333	1.81818	1.40097	4.54545	3.83524
5.05051	0.33865	2.0202	0.00445	5.05051	0.16887		5.05051	0.33865	2.0202	0.1617	5.05051	0.22624		5.05051	0.33865	2.0202	2.12285	5.05051	4.7134
5.55556	0.30097	2.22222	0.00387	5.55556	0.17064		5.55556	0.30097	2.22222	0.18456	5.55556	0.21596		5.55556	0.30097	2.22222	3.14674	5.55556	4.79493
6.06061	0.24955	2.42424	0.00381	6.06061	0.16282		6.06061	0.24955	2.42424	0.21523	6.06061	0.20031		6.06061	0.24955	2.42424	4.24822	6.06061	4.23458
6.56566	0.19548	2.62626	0.00374	6.56566	0.14764		6.56566	0.19548	2.62626	0.24995	6.56566	0.18069		6.56566	0.19548	2.62626	5.23428	6.56566	3.40748
7.07071	0.14716	2.82828	0.00353	7.07071	0.12845		7.07071	0.14716	2.82828	0.28517	7.07071	0.15961		7.07071	0.14716	2.82828	6.11667	7.07071	2.63011
7.57576	0.10821	3.0303	0.00269	7.57576	0.10825		7.57576	0.10821	3.0303	0.31789	7.57576	0.13931		7.57576	0.10821	3.0303	6.67733	7.57576	2.04789
8.08081	0.07868	3.23232	0.00164	8.08081	0.08923		8.08081	0.07868	3.23232	0.34565	8.08081	0.12302		8.08081	0.07868	3.23232	7.02729	8.08081	1.66728
8.58586	0.05698	3.43434	0.00139	8.58586	0.07246		8.58586	0.05698	3.43434	0.36681	8.58586	0.11309		8.58586	0.05698	3.43434	6.9775	8.58586	1.43151
9.09091	0.04132	3.63636	0.00182	9.09091	0.05839		9.09091	0.04132	3.63636	0.38104	9.09091	0.10233		9.09091	0.04132	3.63636	6.67368	9.09091	1.27613
9.59596	0.02982	3.83838	0.00259	9.59596	0.04695		9.59596	0.02982	3.83838	0.38949	9.59596	0.09026		9.59596	0.02982	3.83838	6.19902	9.59596	1.15958
10.101	0.02107	4.0404	0.00325	10.101	0.03765		10.101	0.02107	4.0404	0.39364	10.101	0.07846		10.101	0.02107	4.0404	5.588	10.101	1.05898
10.6061	0.01395	4.24242	0.00353	10.6061	0.02991		10.6061	0.01395	4.24242	0.39442	10.6061	0.06831		10.6061	0.01395	4.24242	4.89691	10.6061	0.96971
11.1111	0.00816	4.44444	0.00358	11.1111	0.02335		11.1111	0.00816	4.44444	0.3919	11.1111	0.05903		11.1111	0.00816	4.44444	4.21467	11.1111	0.88754
11.6162	0.00366	4.64646	0.00343	11.6162	0.01789		11.6162	0.00366	4.64646	0.3854	11.6162	0.05187		11.6162	0.00366	4.64646	3.60497	11.6162	0.81566
12.1212	0.000837011	4.84848	0.00294	12.1212	0.01351		12.1212	0.000837011	4.84848	0.37418	12.1212	0.04656		12.1212	0.000837011	4.84848	2.99099	12.1212	0.75575
12.6263	0	5.05051	0.00243	12.6263	0.01011		12.6263	0	5.05051	0.35799	12.6263	0.04136		12.6263	0	5.05051	2.47289	12.6263	0.70126
13.1313	0	5.25253	0.00244	13.1313	0.00757		13.1313	0	5.25253	0.33706	13.1313	0.035		13.1313	0	5.25253	1.97493	13.1313	0.65015
13.6364	0	5.45455	0.00271	13.6364	0.00584		13.6364	0	5.45455	0.31203	13.6364	0.02669		13.6364	0	5.45455	1.55492	13.6364	0.60739
14.1414	0	5.65657	0.00289	14.1414	0.00479		14.1414	0	5.65657	0.28393	14.1414	0.01882		14.1414	0	5.65657	1.19503	14.1414	0.57166
14.6465	0	5.85859	0.0031	14.6465	0.00417		14.6465	0	5.85859	0.25429	14.6465	0.01358		14.6465	0	5.85859	0.76263	14.6465	0.53552
15.1515	0	6.06061	0.00297	15.1515	0.00368		15.1515	0	6.06061	0.22491	15.1515	0.01451		15.1515	0	6.06061	0.24921	15.1515	0.49733
15.6566	0	6.26263	0.00235	15.6566	0.00324		15.6566	0	6.26263	0.19736	15.6566	0.01769		15.6566	0	6.26263	0	15.6566	0.46326
16.1616	0	6.46465	0.0018	16.1616	0.0028		16.1616	0	6.46465	0.17263	16.1616	0.0203		16.1616	0	6.46465	0	16.1616	0.4428
16.6667	0	6.66667	0.00179	16.6667	0.00242		16.6667	0	6.66667	0.15123	16.6667	0.02174		16.6667	0	6.66667	0	16.6667	0.43347
17.1717	0	6.86869	0.00209	17.1717	0.00214		17.1717	0	6.86869	0.13316	17.1717	0.02018		17.1717	0	6.86869	0	17.1717	0.42403
17.6768	0	7.07071	0.00232	17.6768	0.00192		17.6768	0	7.07071	0.11808	17.6768	0.01762		17.6768	0	7.07071	0	17.6768	0.40558
18.1818	0	7.27273	0.00226	18.1818	0.00171		18.1818	0	7.27273	0.10534	18.1818	0.01621		18.1818	0	7.27273	0	18.1818	0.37264
18.6869	0	7.47475	0.00195	18.6869	0.00146		18.6869	0	7.47475	0.0942	18.6869	0.01564		18.6869	0	7.47475	0	18.6869	0.32613
19.1919	0	7.67677	0.00162	19.1919	0.00111		19.1919	0	7.67677	0.08386	19.1919	0.01364		19.1919	0	7.67677	0	19.1919	0.27855
19.697	0	7.87879	0.0014	19.697	0.000711008		19.697	0	7.87879	0.07369	19.697	0.01212		19.697	0	7.87879	0	19.697	0.24658
20.202	0	8.08081	0.00129	20.202	0.000386812		20.202	0	8.08081	0.06321	20.202	0.01301		20.202	0	8.08081	0	20.202	0.24205
20.7071	0	8.28283	0.00128	20.7071	0.000151564		20.7071	0	8.28283	0.05224	20.7071	0.01518		20.7071	0	8.28283	0	20.7071	0.25808
21.2121	0	8.48485	0.00123	21.2121	2.14339e-05		21.2121	0	8.48485	0.04091	21.2121	0.01589		21.2121	0	8.48485	0	21.2121	0.27858
21.7172	0	8.68687	0.00104	21.7172	0		21.7172	0	8.68687	0.02968	21.7172	0.01431		21.7172	0	8.68687	0	21.7172	0.29469
22.2222	0	8.88889	0.000838528	22.2222	0		22.2222	0	8.88889	0.01923	22.2222	0.01267		22.2222	0	8.88889	0	22.2222	0.30047
22.7273	0	9.09091	0.00059678	22.7273	0		22.7273	0	9.09091	0.01043	22.7273	0.01286		22.7273	0	9.09091	0	22.7273	0.2931
23.2323	0	9.29293	0.000256801	23.2323	0		23.2323	0	9.29293	0.00412	23.2323	0.0146		23.2323	0	9.29293	0	23.2323	0.27008
23.7374	0	9.49495	0	23.7374	0		23.7374	0	9.49495	0.000773336	23.7374	0.01573		23.7374	0	9.49495	0	23.7374	0.2295
24.2424	0	9.69697	0	24.2424	9.79237e-05		24.2424	0	9.69697	0	24.2424	0.01347		24.2424	0	9.69697	0	24.2424	0.17758
24.7475	0	9.89899	0.000540732	24.7475	0.000385222		24.7475	0	9.89899	0	24.7475	0.00843		24.7475	0	9.89899	0	24.7475	0.12119
25.2525	0	10.101	0.0013	25.2525	0.00078361		25.2525	0	10.101	0	25.2525	0.00361		25.2525	0	10.101	0	25.2525	0.07317
25.7576	0	10.303	0.00176	25.7576	0.00112		25.7576	0	10.303	0	25.7576	0.00141		25.7576	0	10.303	0	25.7576	0.04925
26.2626	0	10.5051	0.00163	26.2626	0.00131		26.2626	0	10.5051	0	26.2626	0.00271		26.2626	0	10.5051	0	26.2626	0.05569
26.7677	0	10.7071	0.00103	26.7677	0.00137		26.7677	0	10.7071	0	26.7677	0.00677		26.7677	0	10.7071	0	26.7677	0.08338
27.2727	0	10.9091	0.000510251	27.2727	0.00136		27.2727	0	10.9091	0	27.2727	0.01146		27.2727	0	10.9091	0	27.2727	0.11881
27.7778	0	11.1111	0.00031756	27.7778	0.00131		27.7778	0	11.1111	0	27.7778	0.01337		27.7778	0	11.1111	0	27.7778	0.1504
28.2828	0	11.3131	0.00022458	28.2828	0.00121		28.2828	0	11.3131	0	28.2828	0.01048		28.2828	0	11.3131	0	28.2828	0.17182
28.7879	0	11.5152	8.64959e-05	28.7879	0.000991979		28.7879	0	11.5152	0	28.7879	0.00532		28.7879	0	11.5152	0	28.7879	0.1829
29.2929	0	11.7172	8.1206e-06	29.2929	0.000646377		29.2929	0	11.7172	0	29.2929	0.00117		29.2929	0	11.7172	0	29.2929	0.1867
29.798	0	11.9192	0	29.798	0.000283045		29.798	0	11.9192	0	29.798	0		29.798	0	11.9192	0	29.798	0.18429
30.303	0	12.1212	0	30.303	4.16907e-05		30.303	0	12.1212	0	30.303	0		30.303	0	12.1212	0	30.303	0.17759
30.8081	0	12.3232	0	30.8081	0		30.8081	0	12.3232	0	30.8081	0		30.8081	0	12.3232	0	30.8081	0.16948
31.3131	0	12.5253	0	31.3131	0		31.3131	0	12.5253	0	31.3131	0		31.3131	0	12.5253	0	31.3131	0.16002
31.8182	0	12.7273	0	31.8182	0		31.8182	0	12.7273	0	31.8182	0.000935042		31.8182	0	12.7273	0	31.8182	0.14566
32.3232	0	12.9293	0	32.3232	0		32.3232	0	12.9293	0	32.3232	0.00356		32.3232	0	12.9293	0	32.3232	0.12322
32.8283	0	13.1313	0	32.8283	0		32.8283	0	13.1313	0	32.8283	0.00611		32.8283	0	13.1313	0	32.8283	0.09562
33.3333	0	13.3333	0	33.3333	0		33.3333	0	13.3333	0	33.3333	0.00689		33.3333	0	13.3333	0	33.3333	0.06759
33.8384	0	13.5354	0	33.8384	0		33.8384	0	13.5354	0	33.8384	0.00477		33.8384	0	13.5354	0	33.8384	0.04249
34.3434	0	13.7374	0	34.3434	0		34.3434	0	13.7374	0	34.3434	0.0016		34.3434	0	13.7374	0	34.3434	0.02209
34.8485	0	13.9394	0	34.8485	0		34.8485	0	13.9394	0	34.8485	0		34.8485	0	13.9394	0	34.8485	0.00712
35.3535	0	14.1414	0	35.3535	0		35.3535	0	14.1414	0	35.3535	0		35.3535	0	14.1414	0	35.3535	0
35.8586	0	14.3434	0	35.8586	0		35.8586	0	14.3434	0	35.8586	0		35.8586	0	14.3434	0	35.8586	0
36.3636	0	14.5455	0	36.3636	0		36.3636	0	14.5455	0	36.3636	0		36.3636	0	14.5455	0	36.3636	0
36.8687	0	14.7475	0	36.8687	0		36.8687	0	14.7475	0	36.8687	0		36.8687	0	14.7475	0	36.8687	0
37.3737	0	14.9495	0	37.3737	0		37.3737	0	14.9495	0	37.3737	0		37.3737	0	14.9495	0	37.3737	0
37.8788	0	15.1515	0	37.8788	0		37.8788	0	15.1515	0	37.8788	0		37.8788	0	15.1515	0	37.8788	0
38.3838	0	15.3535	0	38.3838	0.000160593		38.3838	0	15.3535	0	38.3838	0		38.3838	0	15.3535	0	38.3838	0
38.8889	0	15.5556	0	38.8889	0.000611846		38.8889	0	15.5556	0	38.8889	0		38.8889	0	15.5556	0	38.8889	0.000893199
39.3939	0	15.7576	0	39.3939	0.00129		39.3939	0	15.7576	0	39.3939	0		39.3939	0	15.7576	0	39.3939	0.01294
39.899	0	15.9596	0	39.899	0.002		39.899	0	15.9596	0	39.899	0		39.899	0	15.9596	0	39.899	0.03595
40.404	0	16.1616	0	40.404	0.00251		40.404	0	16.1616	0	40.404	0		40.404	0	16.1616	0	40.404	0.06508
40.9091	0	16.3636	0	40.9091	0.00264		40.9091	0	16.3636	0	40.9091	0		40.9091	0	16.3636	0	40.9091	0.09331
41.4141	0	16.5657	0	41.4141	0.00238		41.4141	0	16.5657	0	41.4141	0		41.4141	0	16.5657	0	41.4141	0.1131
41.9192	0	16.7677	0	41.9192	0.00184		41.9192	0	16.7677	0	41.9192	0		41.9192	0	16.7677	0	41.9192	0.1212
42.4242	0	16.9697	0	42.4242	0.00119		42.4242	0	16.9697	0	42.4242	0		42.4242	0	16.9697	0	42.4242	0.11949
42.9293	0	17.1717	0	42.9293	0.00058863		42.9293	0	17.1717	0	42.9293	0		42.9293	0	17.1717	0	42.9293	0.11254
43.4343	0	17.3737	0	43.4343	0.000174571		43.4343	0	17.3737	0	43.4343	0		43.4343	0	17.3737	0	43.4343	0.10515
43.9394	0	17.5758	0	43.9394	0		43.9394	0	17.5758	0	43.9394	0		43.9394	0	17.5758	0	43.9394	0.10031
44.4444	0	17.7778	0	44.4444	0		44.4444	0	17.7778	0	44.4444	0		44.4444	0	17.7778	0	44.4444	0.09877
44.9495	0	17.9798	0	44.9495	0		44.9495	0	17.9798	0	44.9495	0		44.9495	0	17.9798	0	44.9495	0.09849
45.4545	0	18.1818	0	45.4545	0		45.4545	0	18.1818	0	45.4545	0		45.4545	0	18.1818	0	45.4545	0.09585
45.9596	0	18.3838	0	45.9596	0		45.9596	0	18.3838	0	45.9596	0		45.9596	0	18.3838	0	45.9596	0.08753
46.4646	0	18.5859	0	46.4646	0		46.4646	0	18.5859	0	46.4646	0		46.4646	0	18.5859	0	46.4646	0.07328
46.9697	0	18.7879	0	46.9697	0		46.9697	0	18.7879	0	46.9697	0		46.9697	0	18.7879	0	46.9697	0.0567
47.4747	0	18.9899	0	47.4747	0		47.4747	0	18.9899	0	47.4747	0		47.4747	0	18.9899	0	47.4747	0.04202
47.9798	0	19.1919	0	47.9798	0.000122371		47.9798	0	19.1919	0	47.9798	0		47.9798	0	19.1919	0	47.9798	0.03321
48.4848	0	19.3939	0	48.4848	0.000576507		48.4848	0	19.3939	0	48.4848	0		48.4848	0	19.3939	0	48.4848	0.03225
48.9899	0	19.596	0	48.9899	0.00137		48.9899	0	19.596	0	48.9899	0		48.9899	0	19.596	0	48.9899	0.03925
49.4949	0	19.798	0	49.4949	0.0024		49.4949	0	19.798	0	49.4949	0.000203763		49.4949	0	19.798	0	49.4949	0.05213
50	0	20	0	50	0.00702		50	0	20	0	50	0.00308		50	0	20	0	50	0.13537

## Sheet: Figure 3 DLS
Figure 3
x-axis (r)	teicoplanin control 0.125mg/mL	teicoplanin control 1.25 mg/mL	teicoplanin control 12.5 mg/mL	BSM control 1 mg/mL	BSM 1 mg/mL + teicoplanin 0.125 mg/mL	BSM 1 mg/mL + teicoplanin 1.25 mg/mL	BSM 1 mg/mL + teicoplanin 12.5 mg/mL
0.2	0	0	0	0	0	0	0
0.2316	0	0	0	0	0	0	0
0.2682	0	0	0	0	0	0	0
0.3106	0	0	0	0	0	0	0
0.3597	0	0	0	0	0	0	0
0.4166	0	0	0	0	0	0	0
0.4825	0	0	0	0	0	0	0
0.5587	0	0	0	0	0	0	0
0.647	0.6	0	0	0	0	0	0
0.7493	3.7	0	0	0	0	0	0
0.8678	2.4	0	0	0	0	0	0
1.005	0	1.2	0	0	0	0	0
1.164	0	5.7	0	0	0	0	0
1.348	0	0.2	0	0	0	0	0
1.561	0	0	0	0	0	0	0
1.808	0	0	0.2	0	0	0	0
2.093	0	0	1.1	0	0	0	0
2.424	0	0	2.6	0	0	0	0
2.807	0	0	4	0	0	0	0
3.251	0	0	4.7	0	0	0	0
3.765	0	0	4.1	0	0	0	0
4.36	0	0	2.5	0	0	0	0
5.05	0	0	0.7	0	0	0	0
5.848	0	0	0	0	0	0	0
6.772	0	0	0	0	0	0	0
7.843	0	0	0	0	0	0	0
9.083	0	0	0	0	0	0	0
10.52	0	0	0	0	0	0	0
12.18	0	0	0	0	0.4	0	0
14.11	0	0	0	0	2.2	0	0
16.34	0	0	0	0	2.9	0	0
18.92	0	0	0	0	1.6	0	0
21.91	0	0	0	0.2	0	0.1	0
25.37	0	0	0	0.9	0	0.4	0
29.39	0	0	0	1.8	0	0.8	0
34.03	0	0	0	2.4	0	1.1	0
39.41	0	0	0	2.4	0	1.1	0
45.64	0	0	0	1.8	0	0.9	0
52.85	0	0	0	0.9	0	0.5	0
61.21	0	0	0	0.2	0	0.2	0
70.89	0	0	0	0	0	0	0
82.09	0	0	0	0	0	0.2	0
95.07	0	0	0	0	0	0.7	0
110.1	0	0	0	0	0	1.5	0
127.5	0	0	0	0	0	2.3	0
147.7	0	0	0	0	0	3	0
171	0	0	0	0	0	3.4	2.7
198	0	0	0	0	0	3.6	10.6
229.3	0	0	0	0	0	3.5	19.3
265.6	0	0	0	0	0	3.4	23.8
307.6	0	0	0	0	0	3.2	21.9
356.2	0	0	0	0	0	3.2	14.7
412.5	0	0	0	0	0	3.4	6.2
477.7	0	0	0	0	0	3.8	0.7
553.2	0	0	0	0	0	4.4	0
640.7	0	0	0	0	0	5.1	0
741.9	0	0	0	0	0	5.7	0
859.2	0	0	0	0	0	6.3	0
995.1	0	0	0	0	0	6.6	0
1152	0	0	0	0	0	6.6	0
1335	0	0	0	0	0	6.3	0
1545	0	0	0	0	0	5.7	0
1790	0	0	0	0	0	4.8	0
2073	0	0	0	0	0	3.8	0
2400	0	0	0	0.5	0	2.8	0
2780	0	0	0	1.8	0	1.8	0
3219	0	0	0	0	0	0	0
3728	0	0	0	0	0	0	0
4317	0	0	0	0	0	0	0
5000	0	0	0	0	0	0	0
